# Supplementary material for: Metabolic adaptation of two in silico mutants of Mycobacterium tuberculosis during infection
Source: PubMed Central journal article supplement (PMC5697012; doi:10.1186/s12918-017-0496-z), 2017-11-21

Metabolic Flux (mmol/gDW/h)

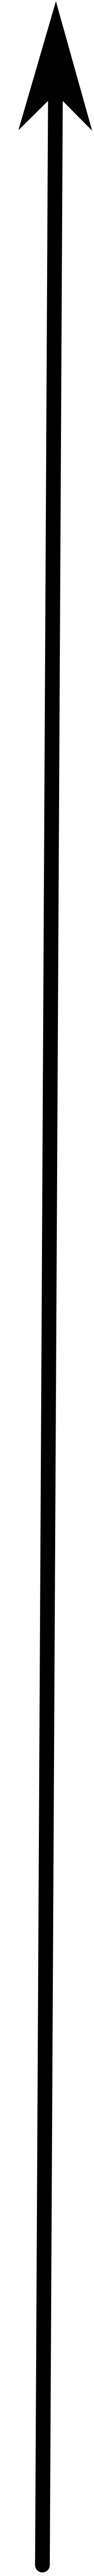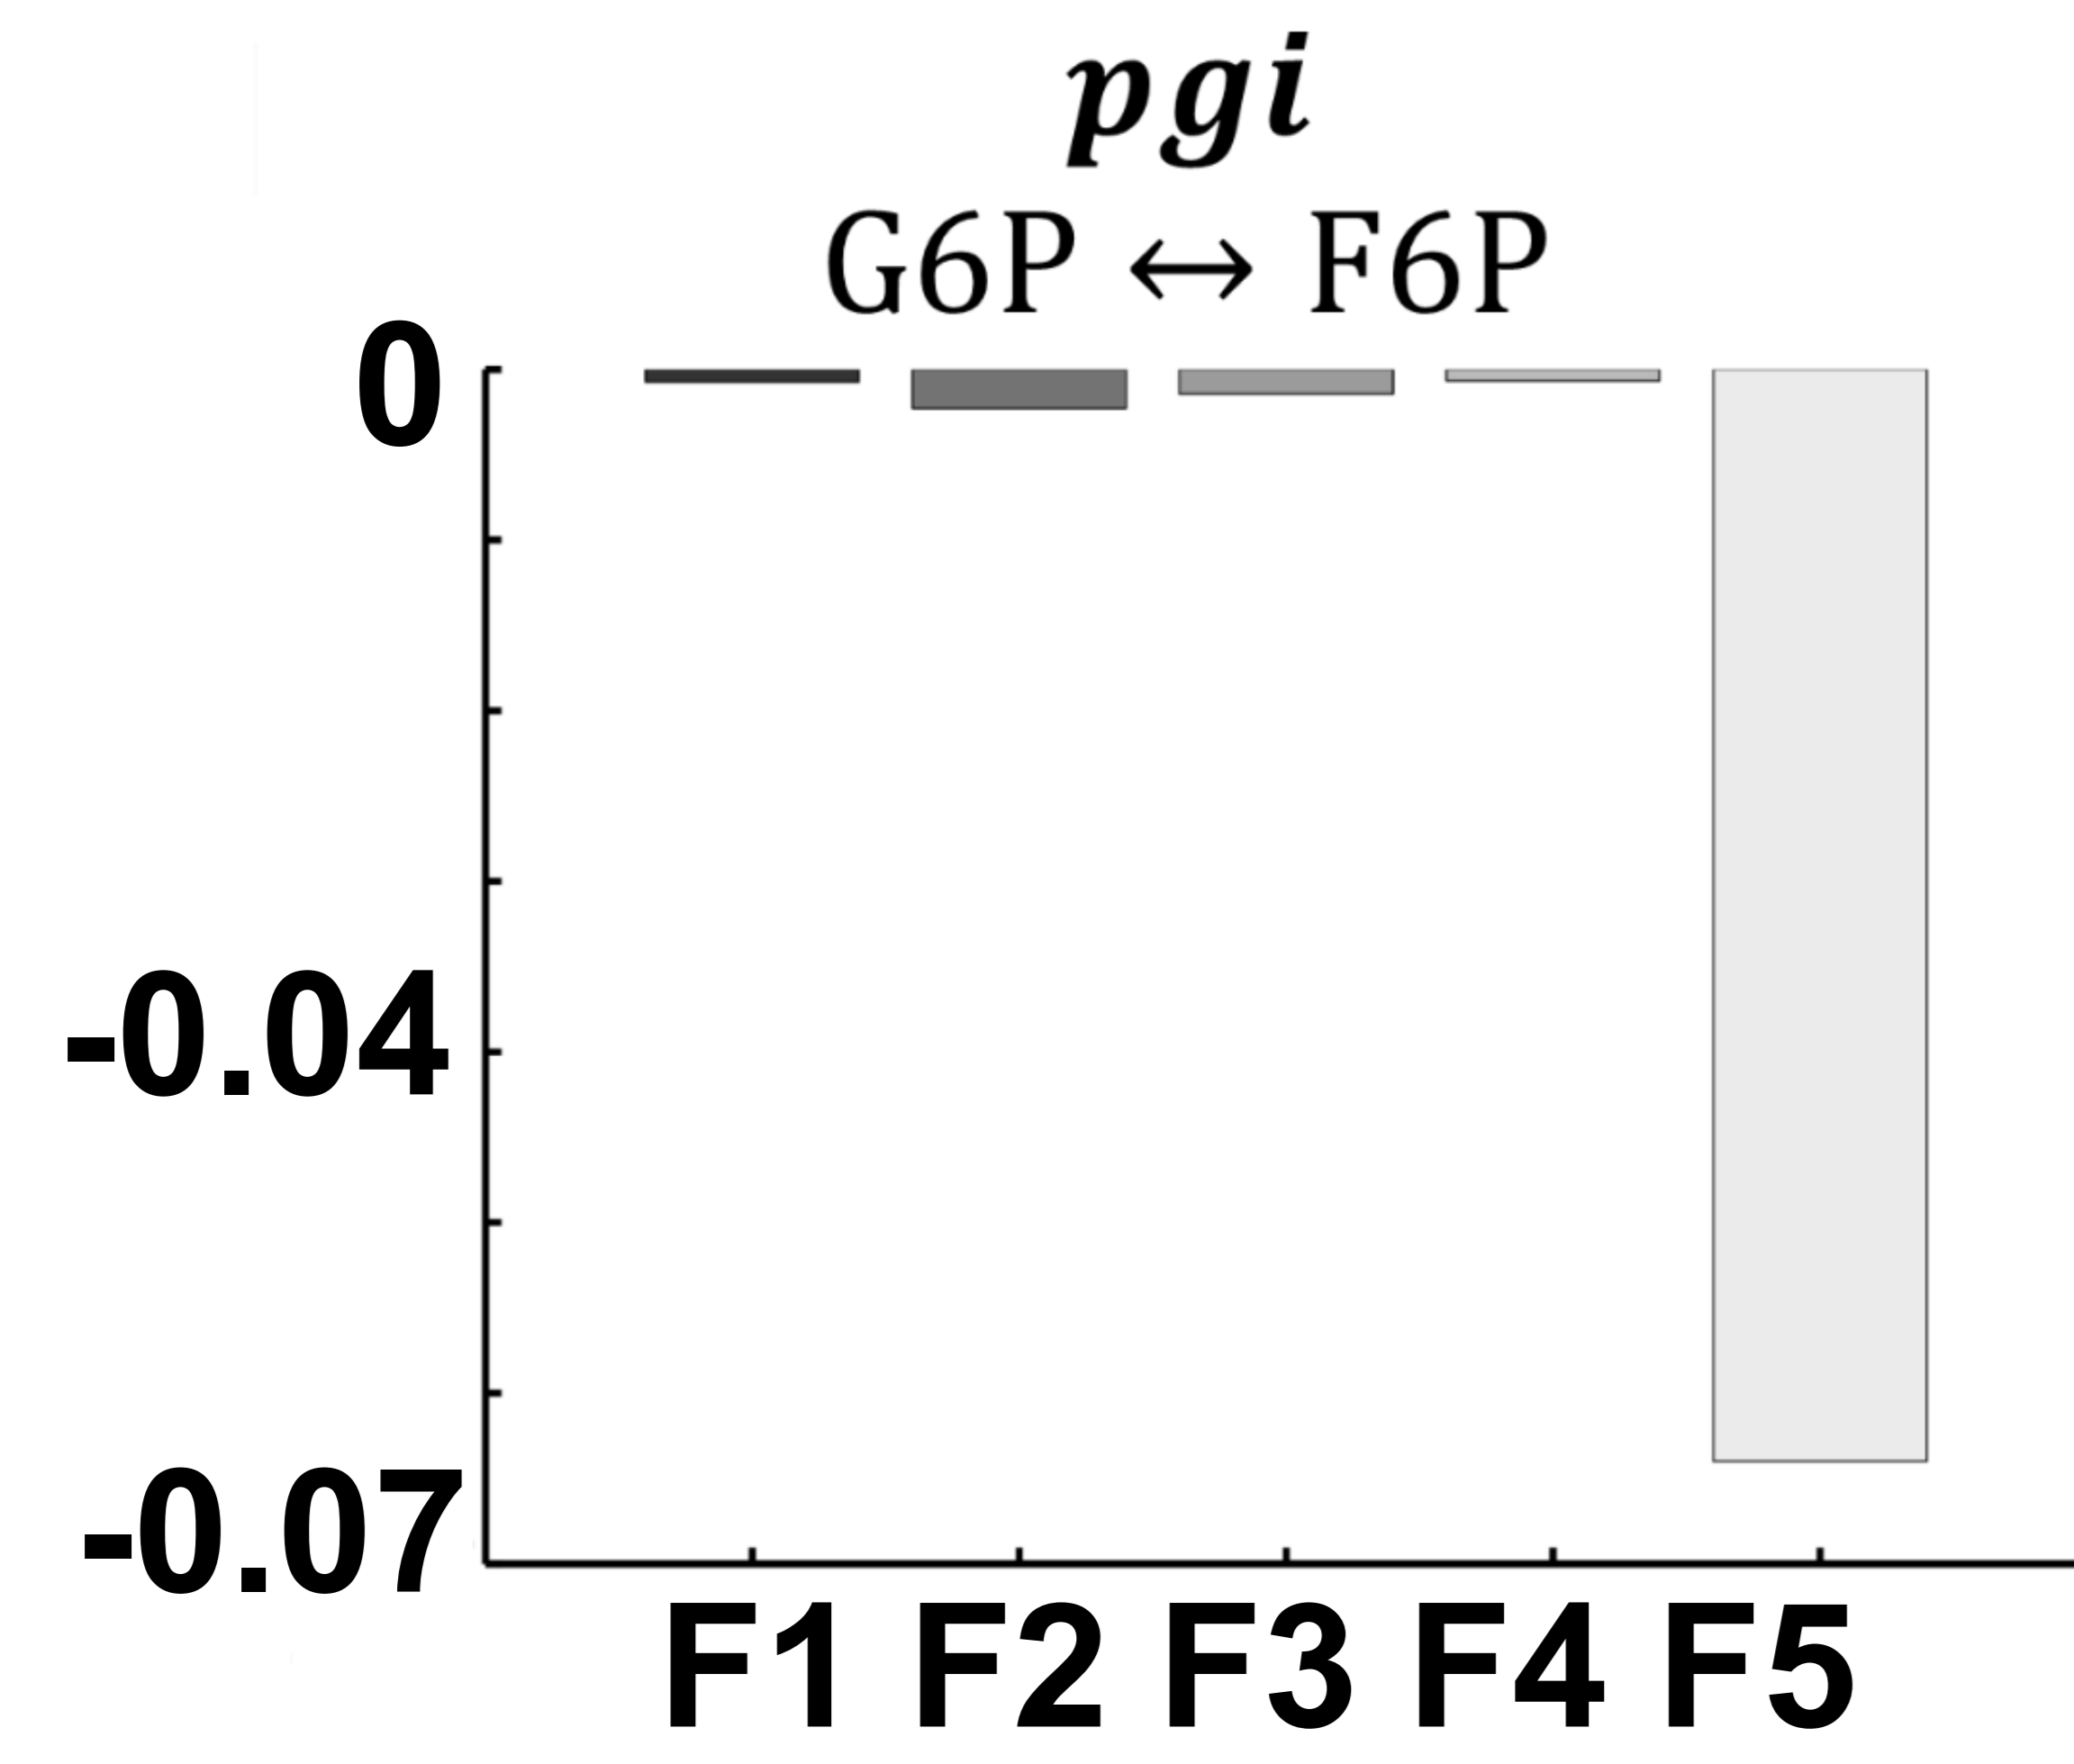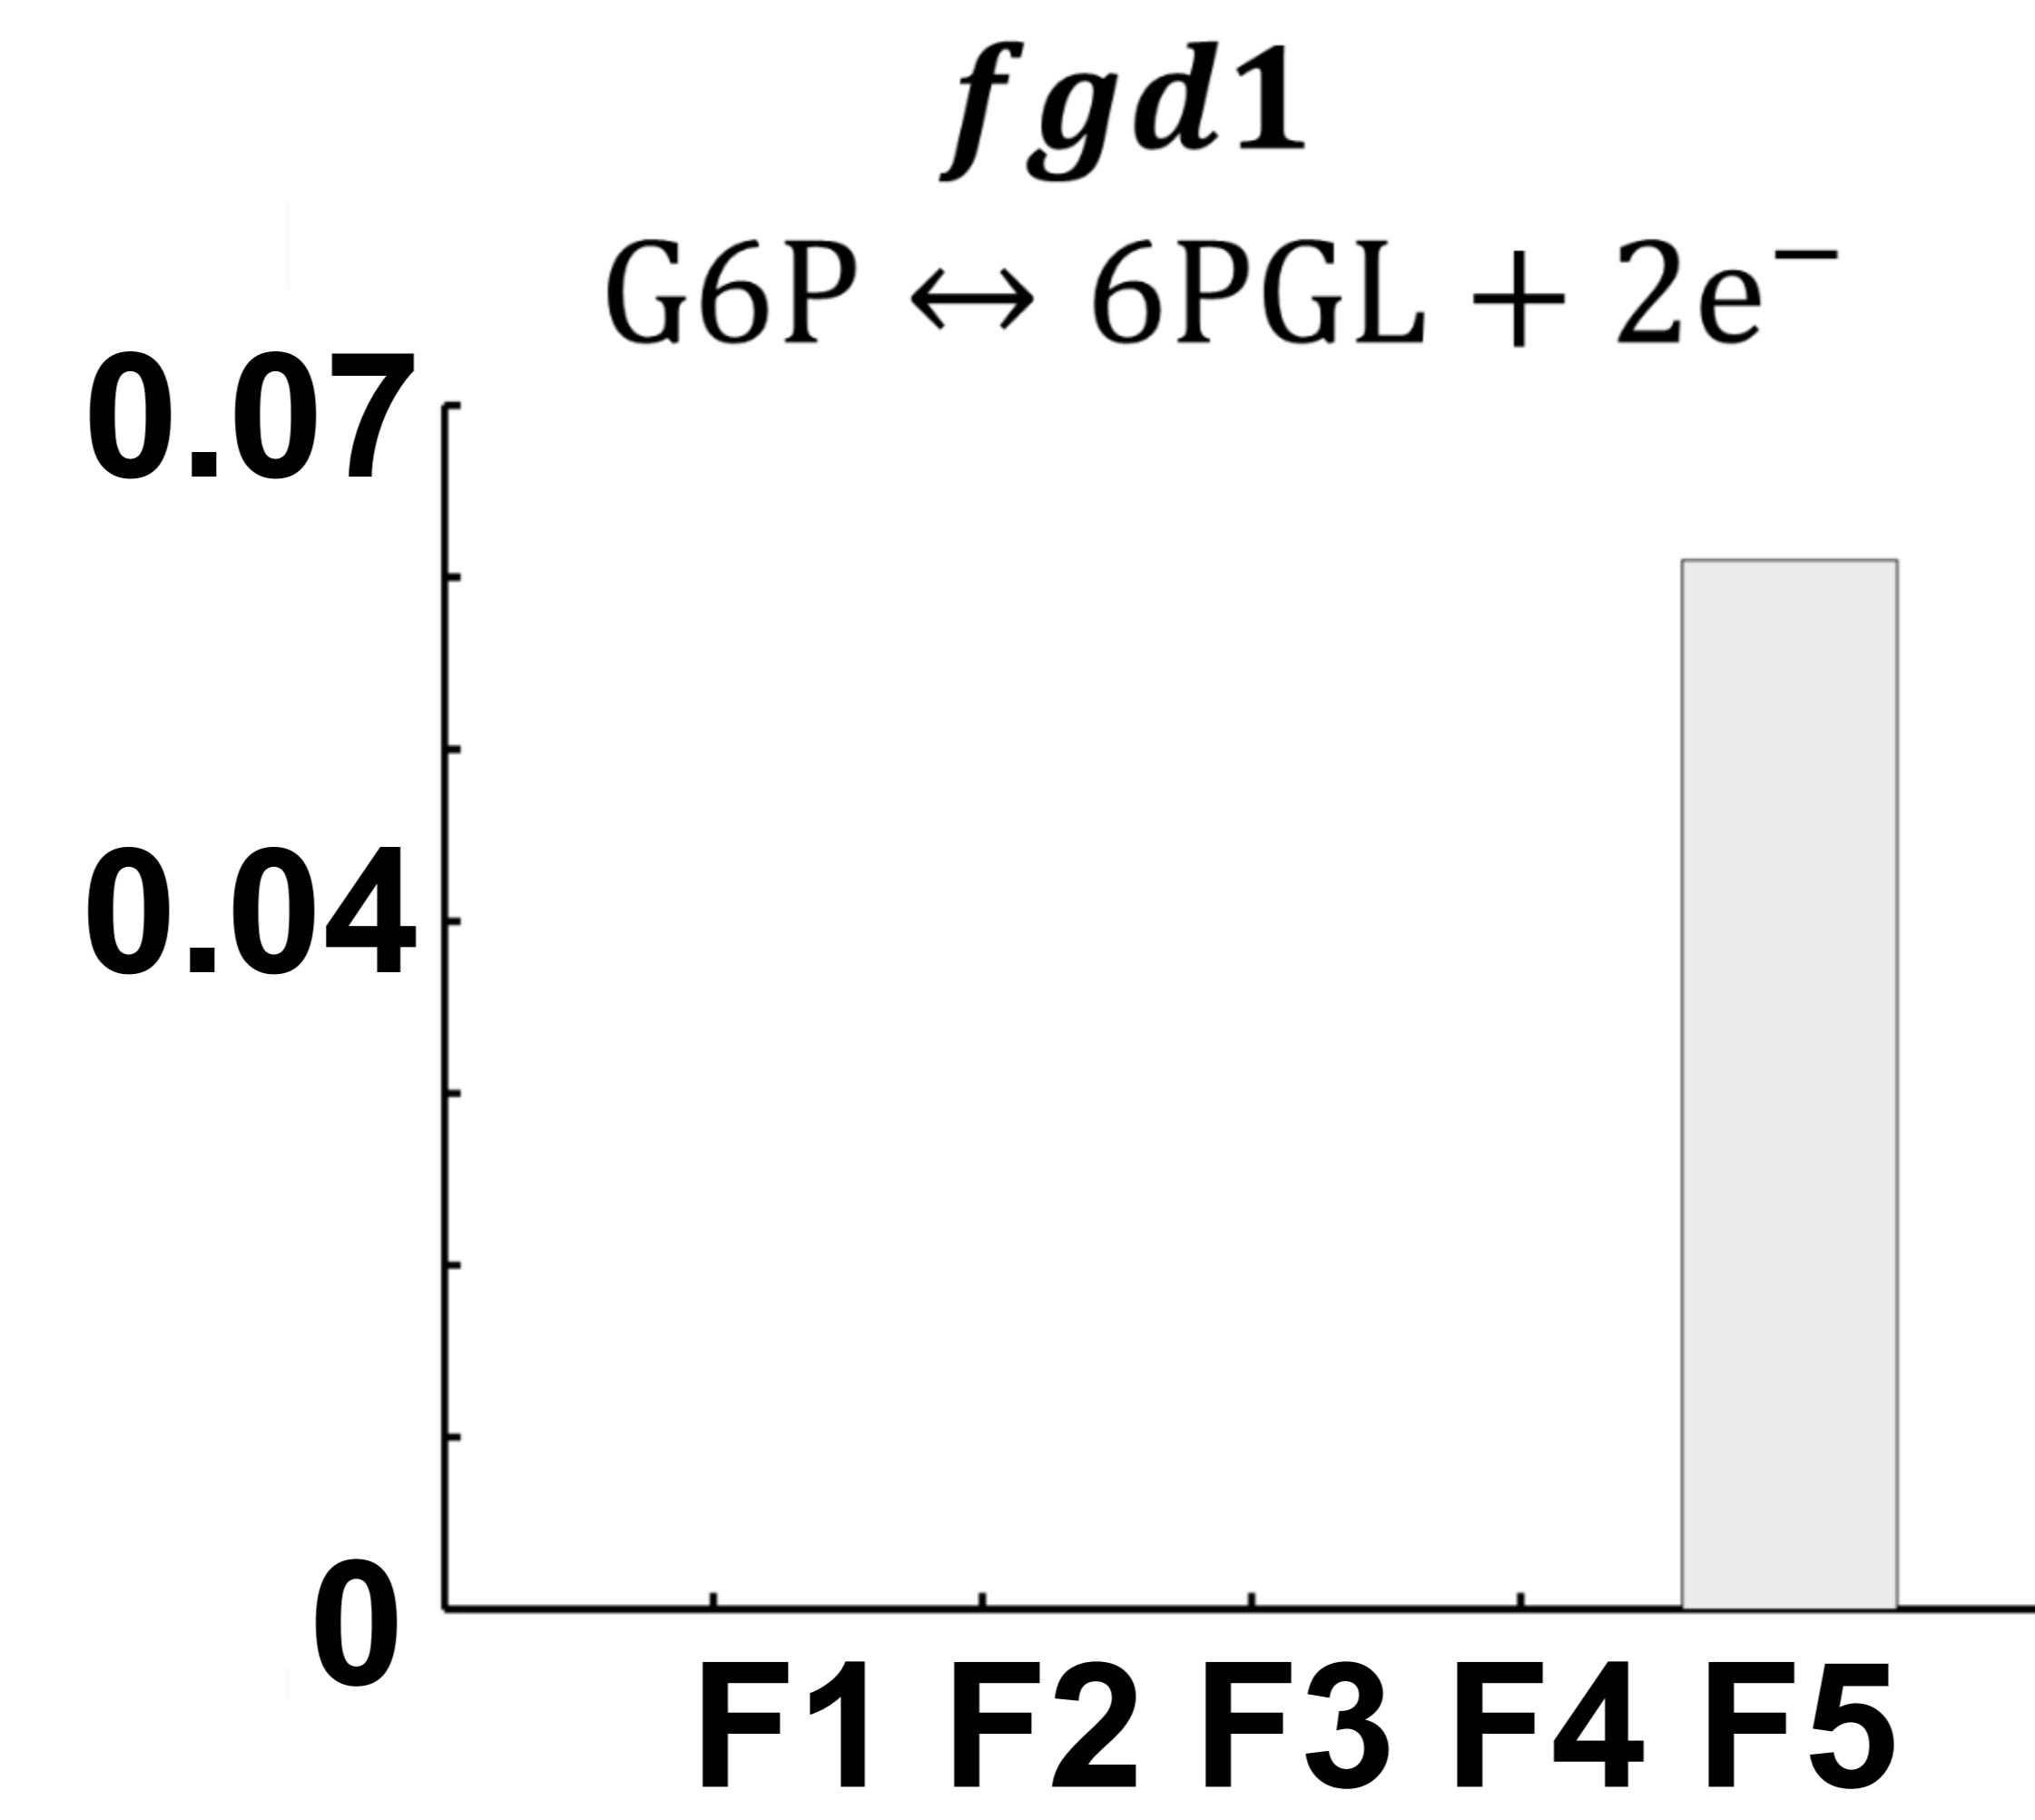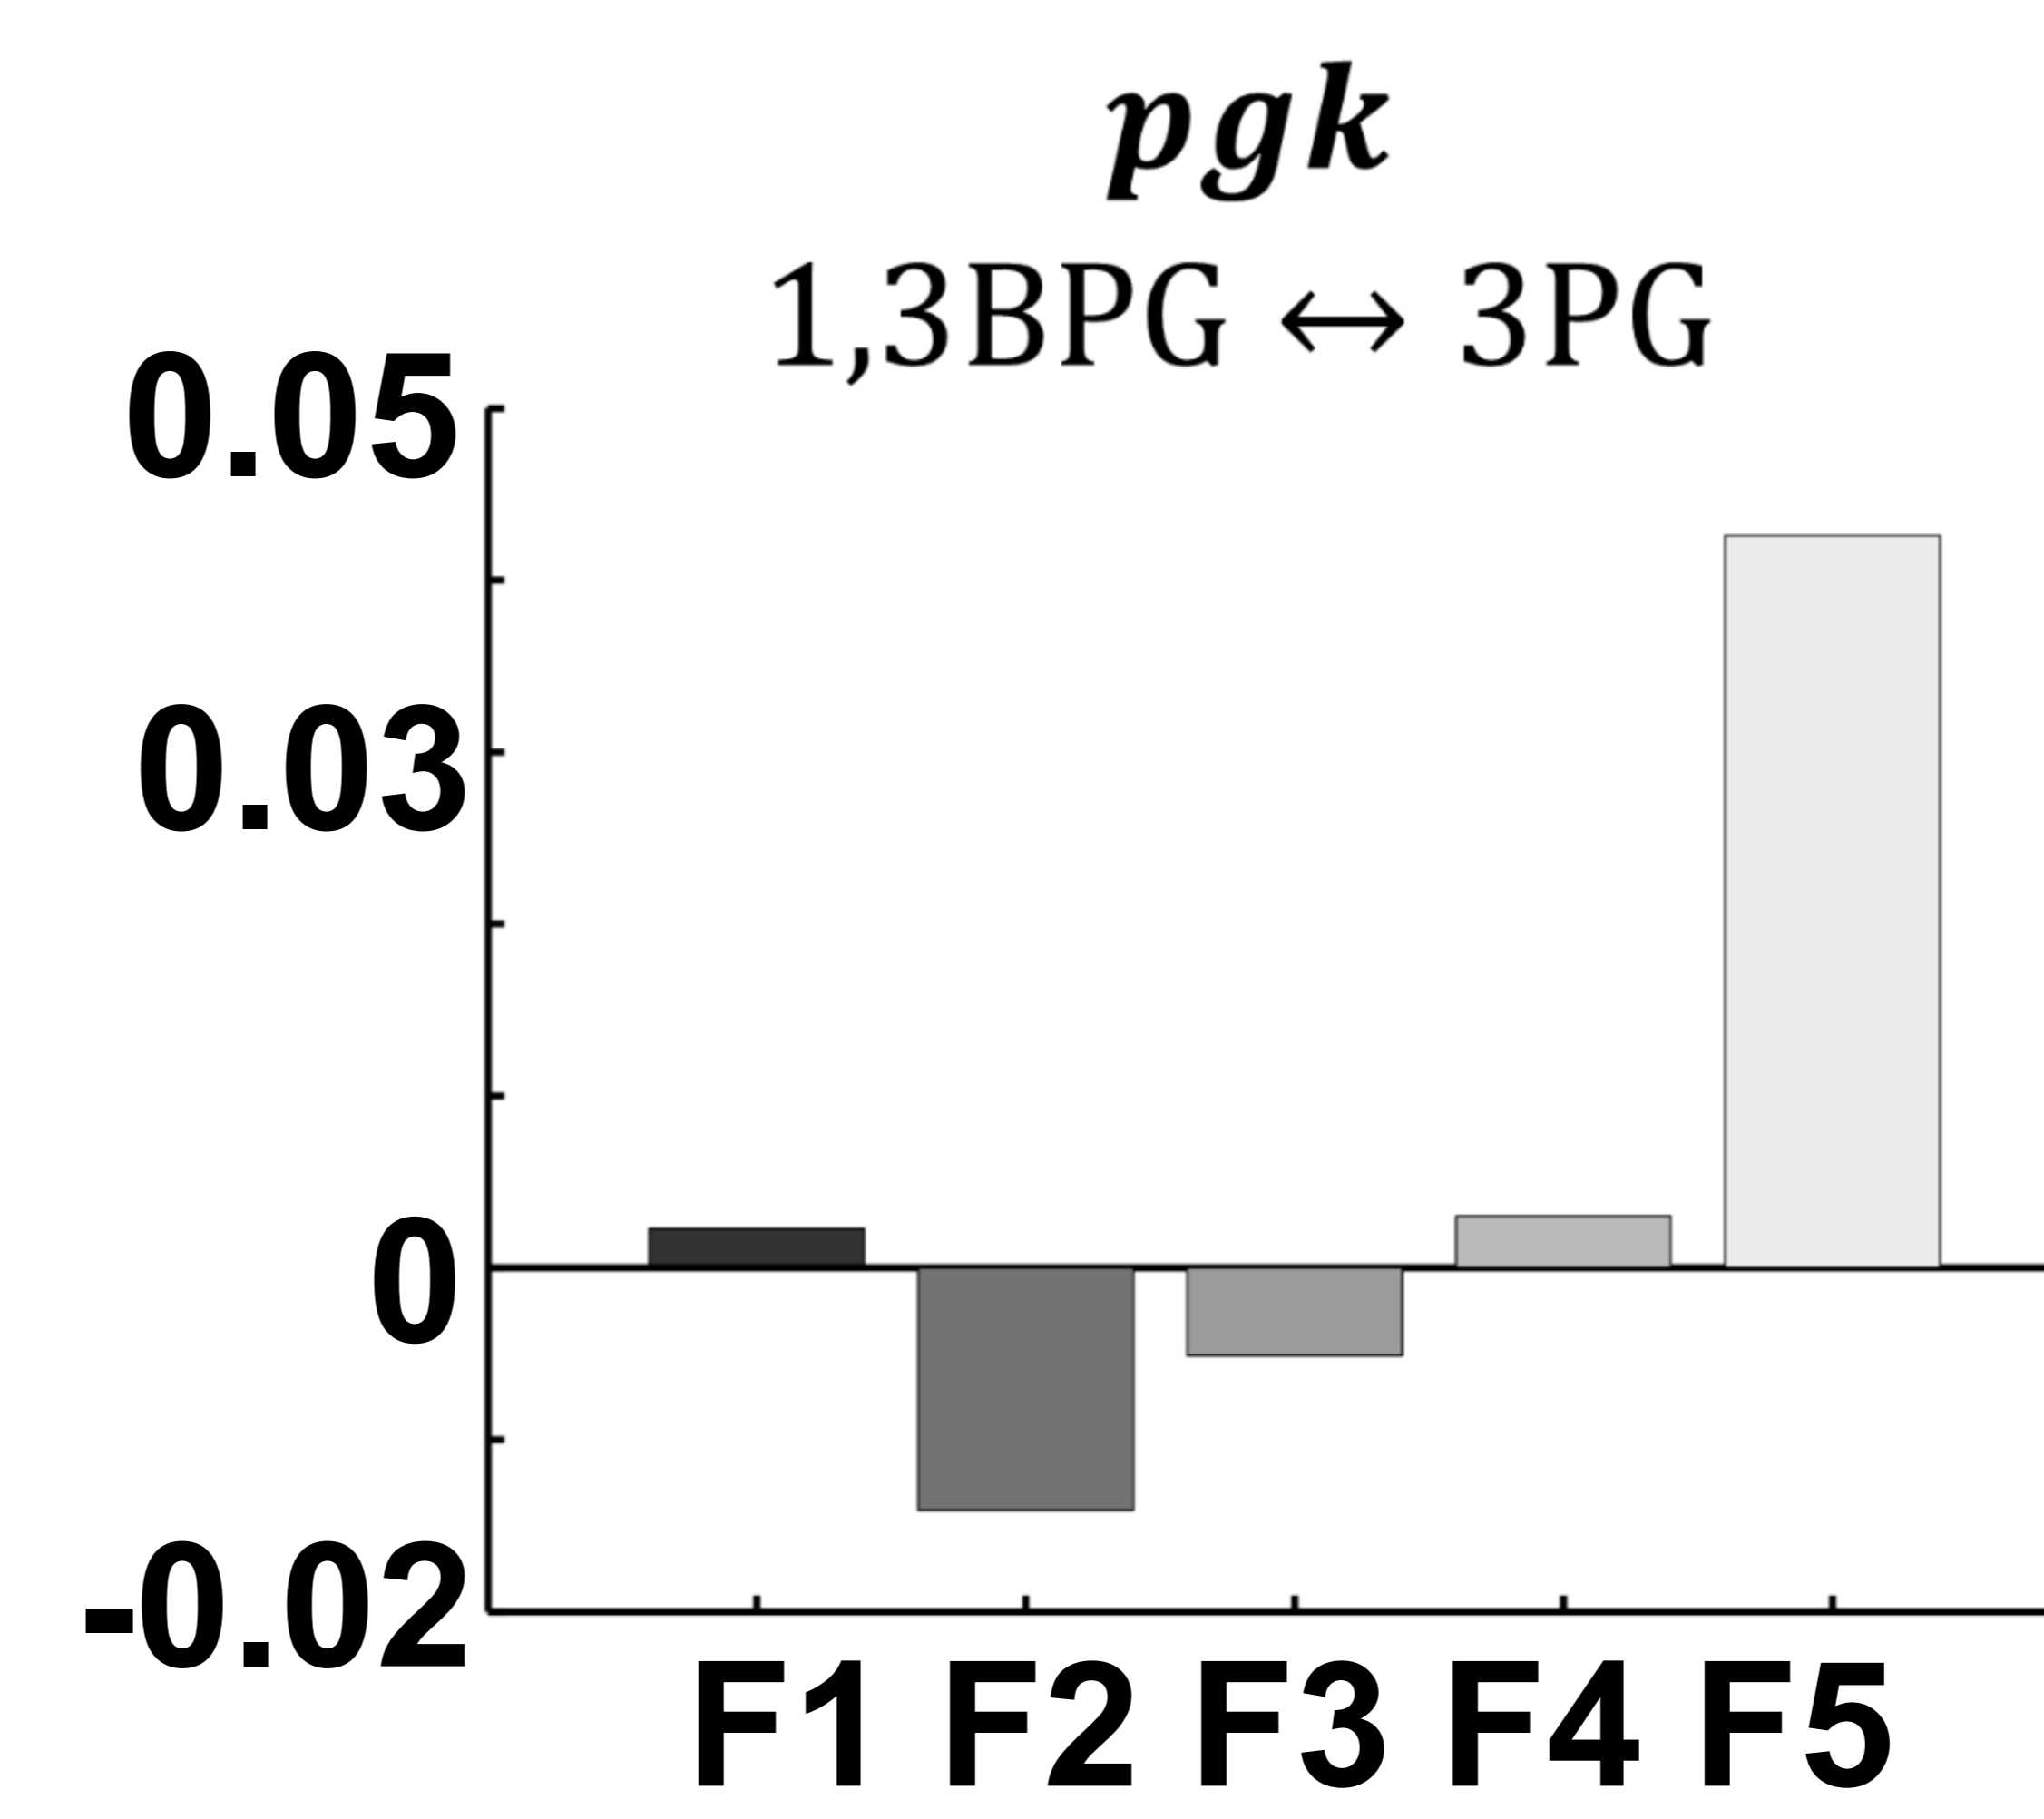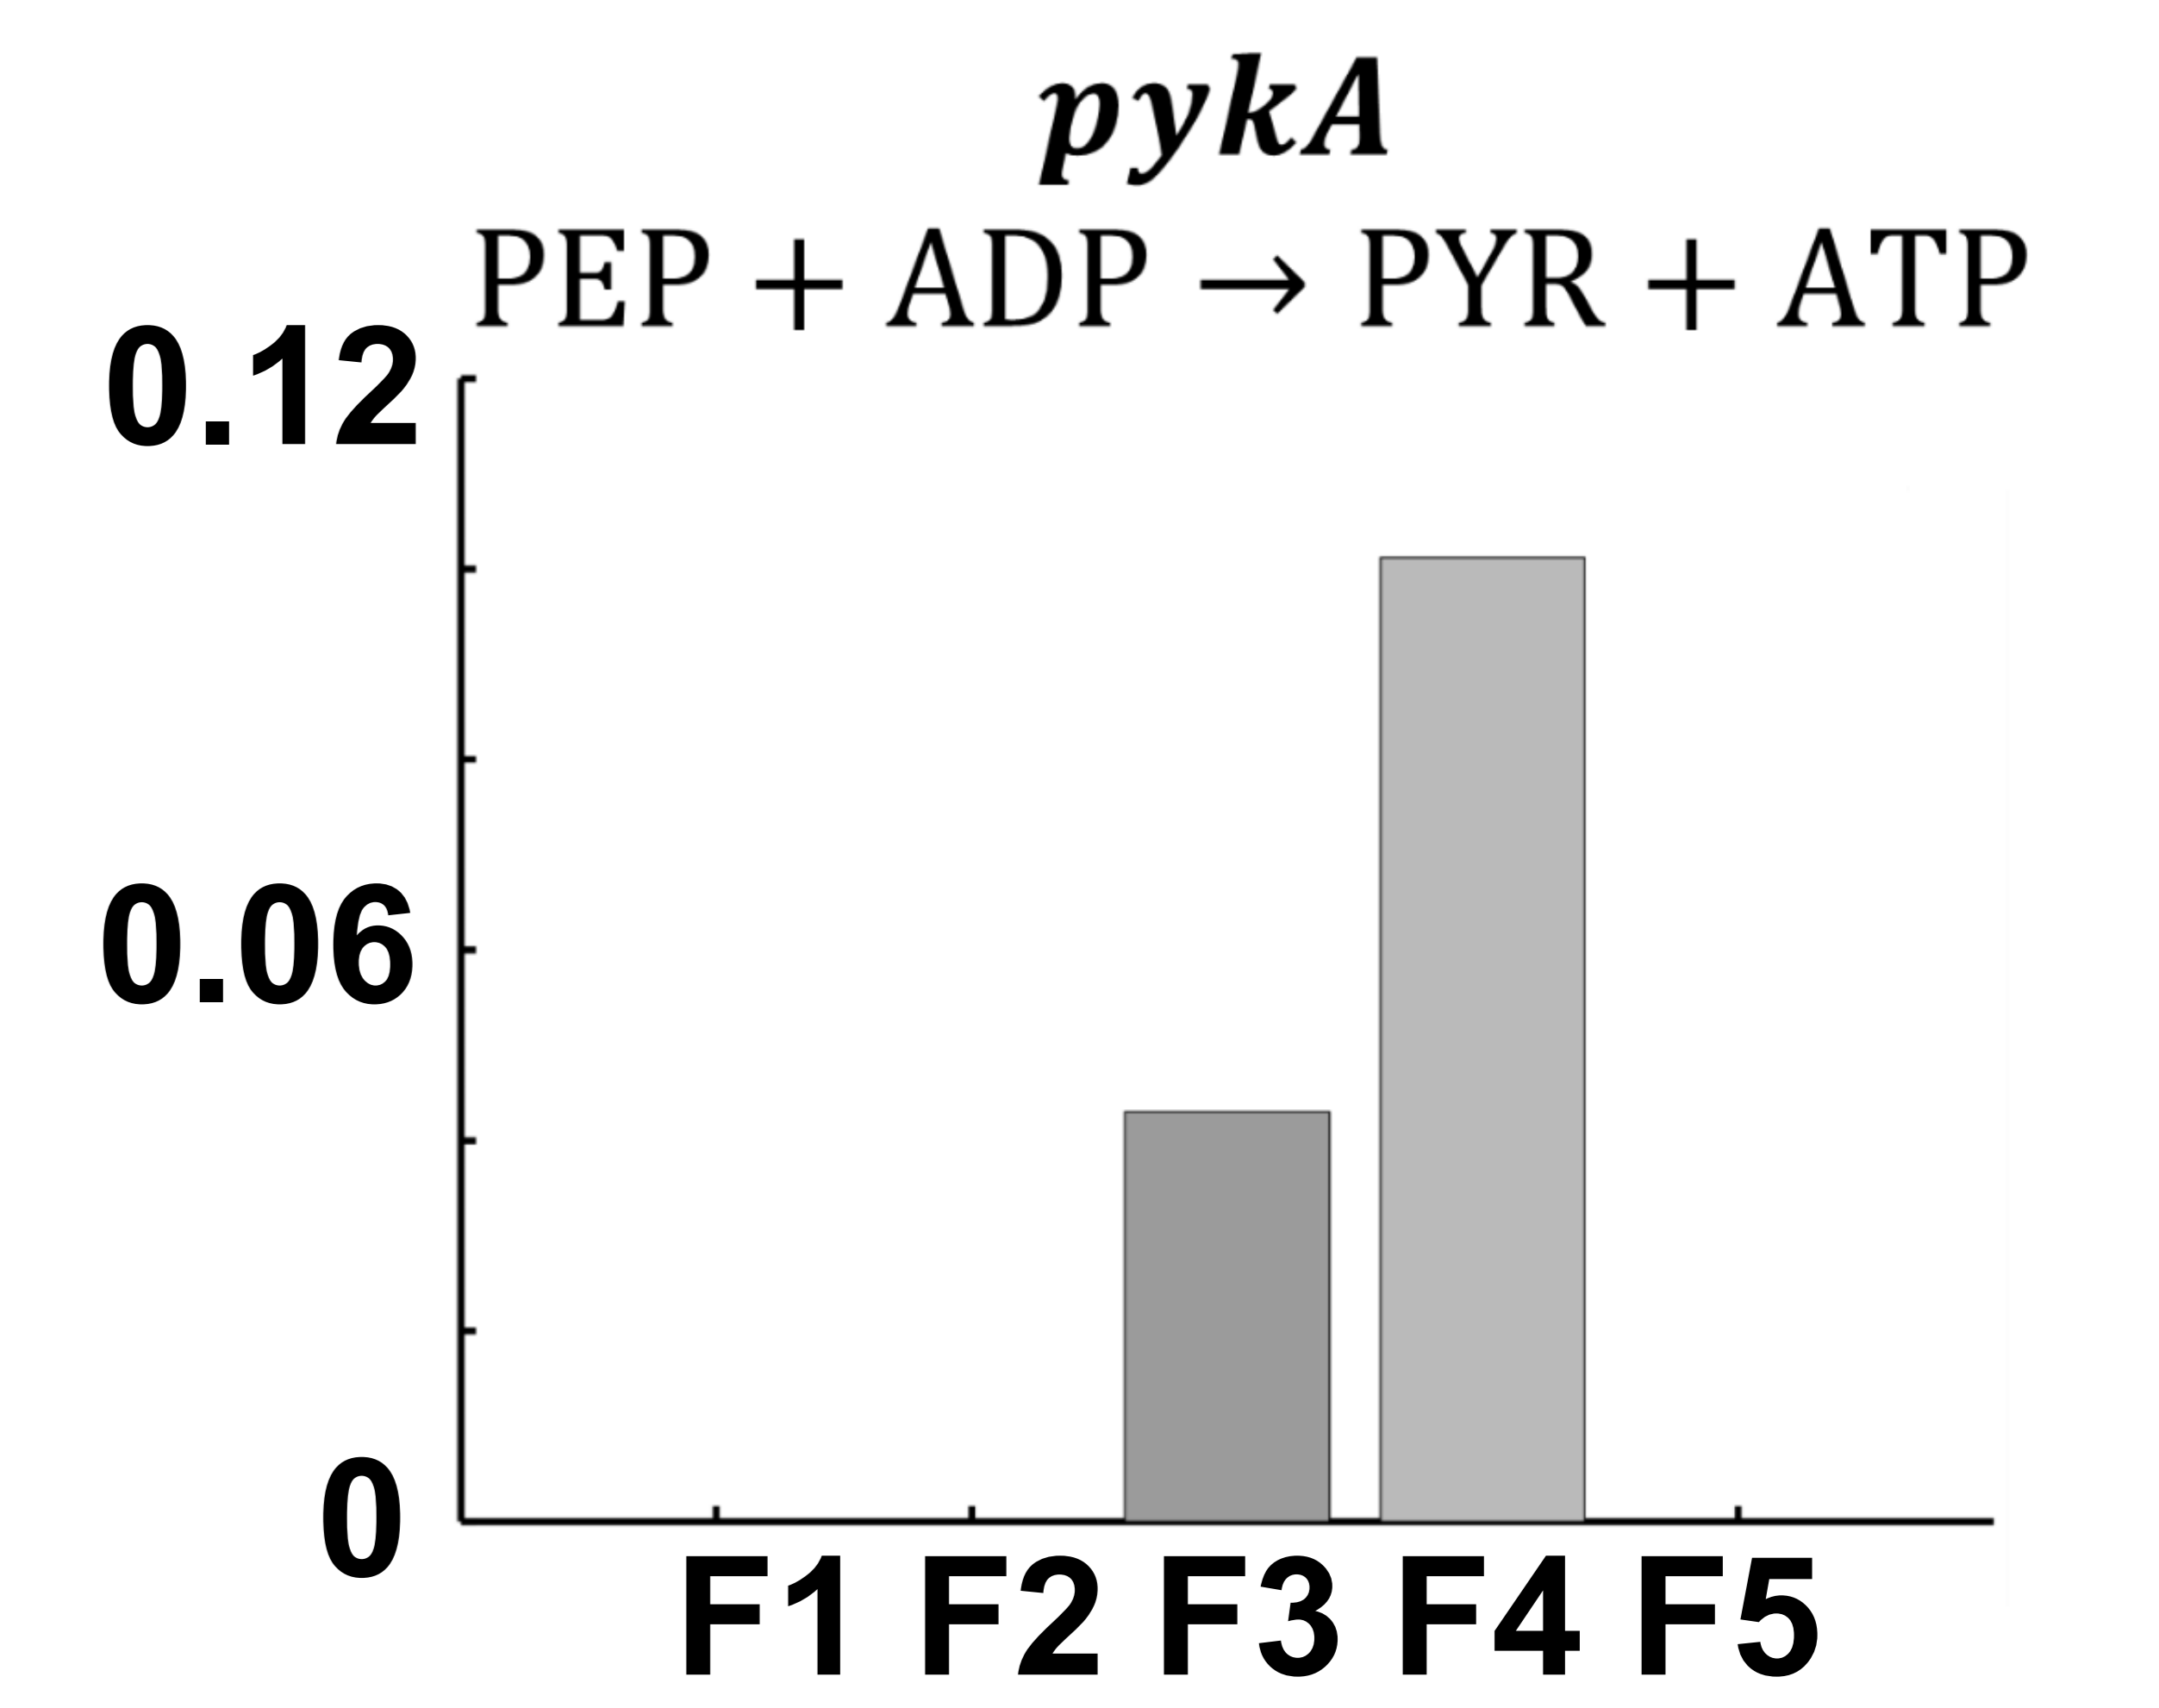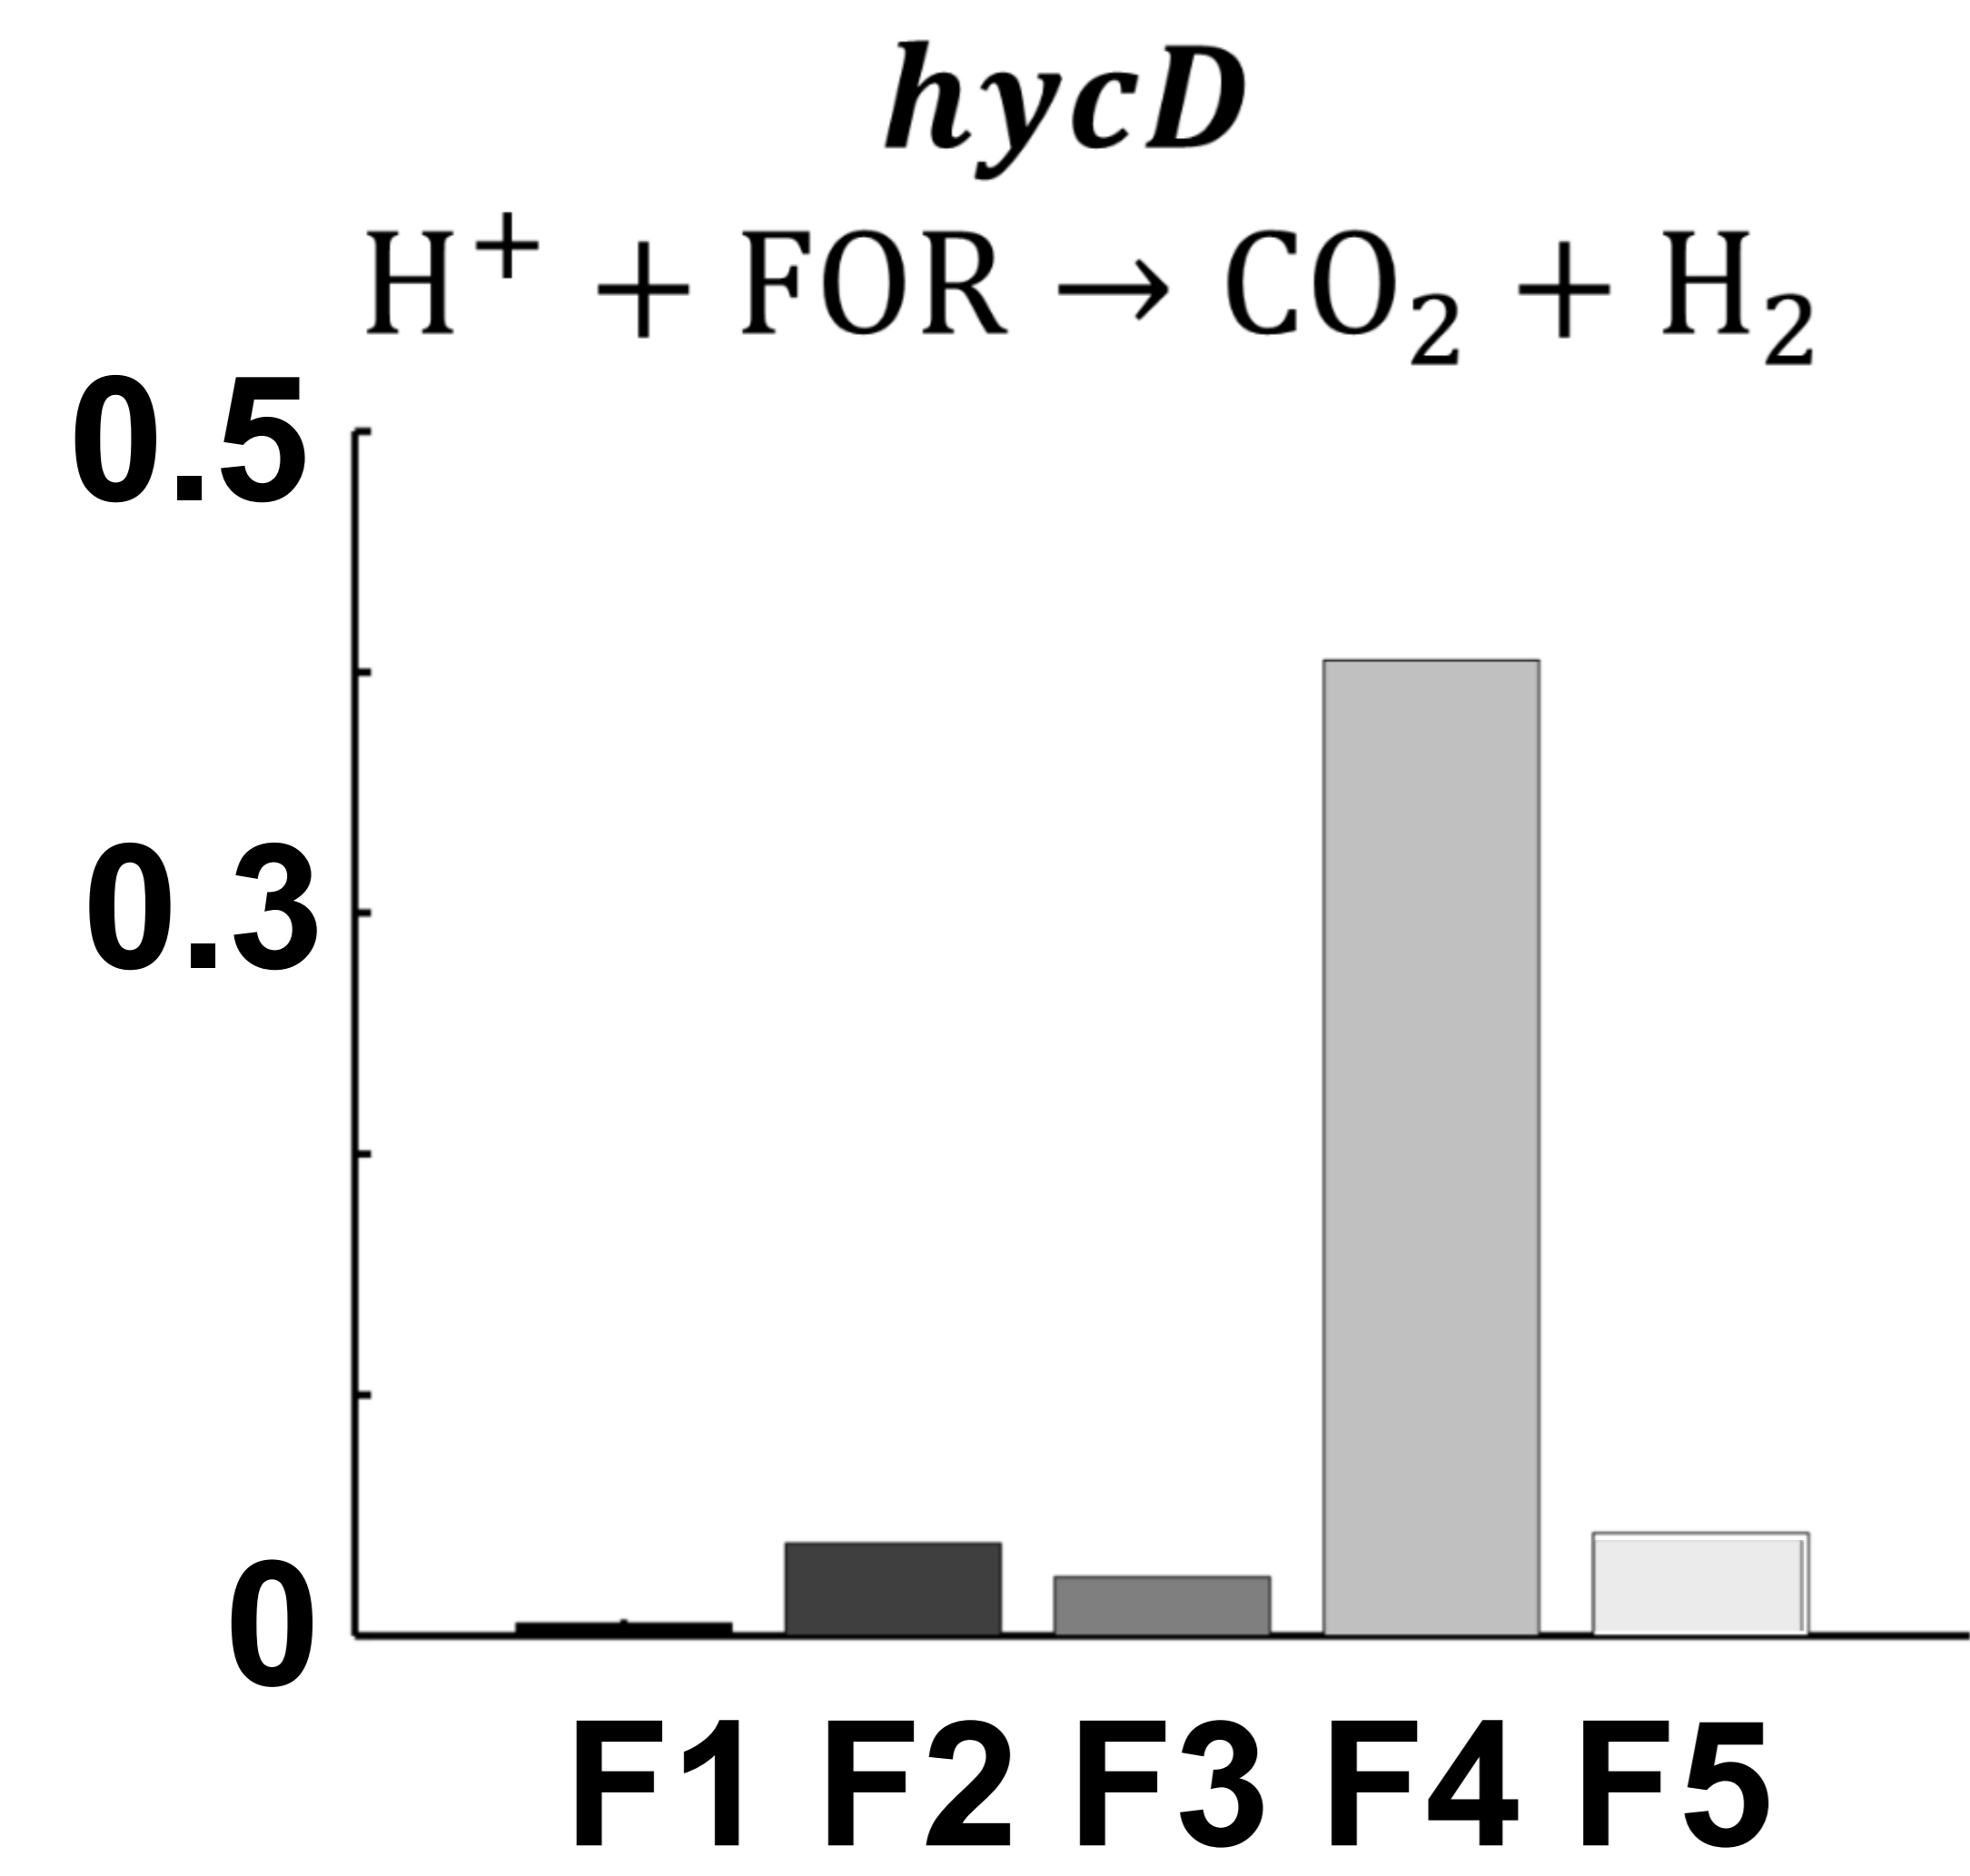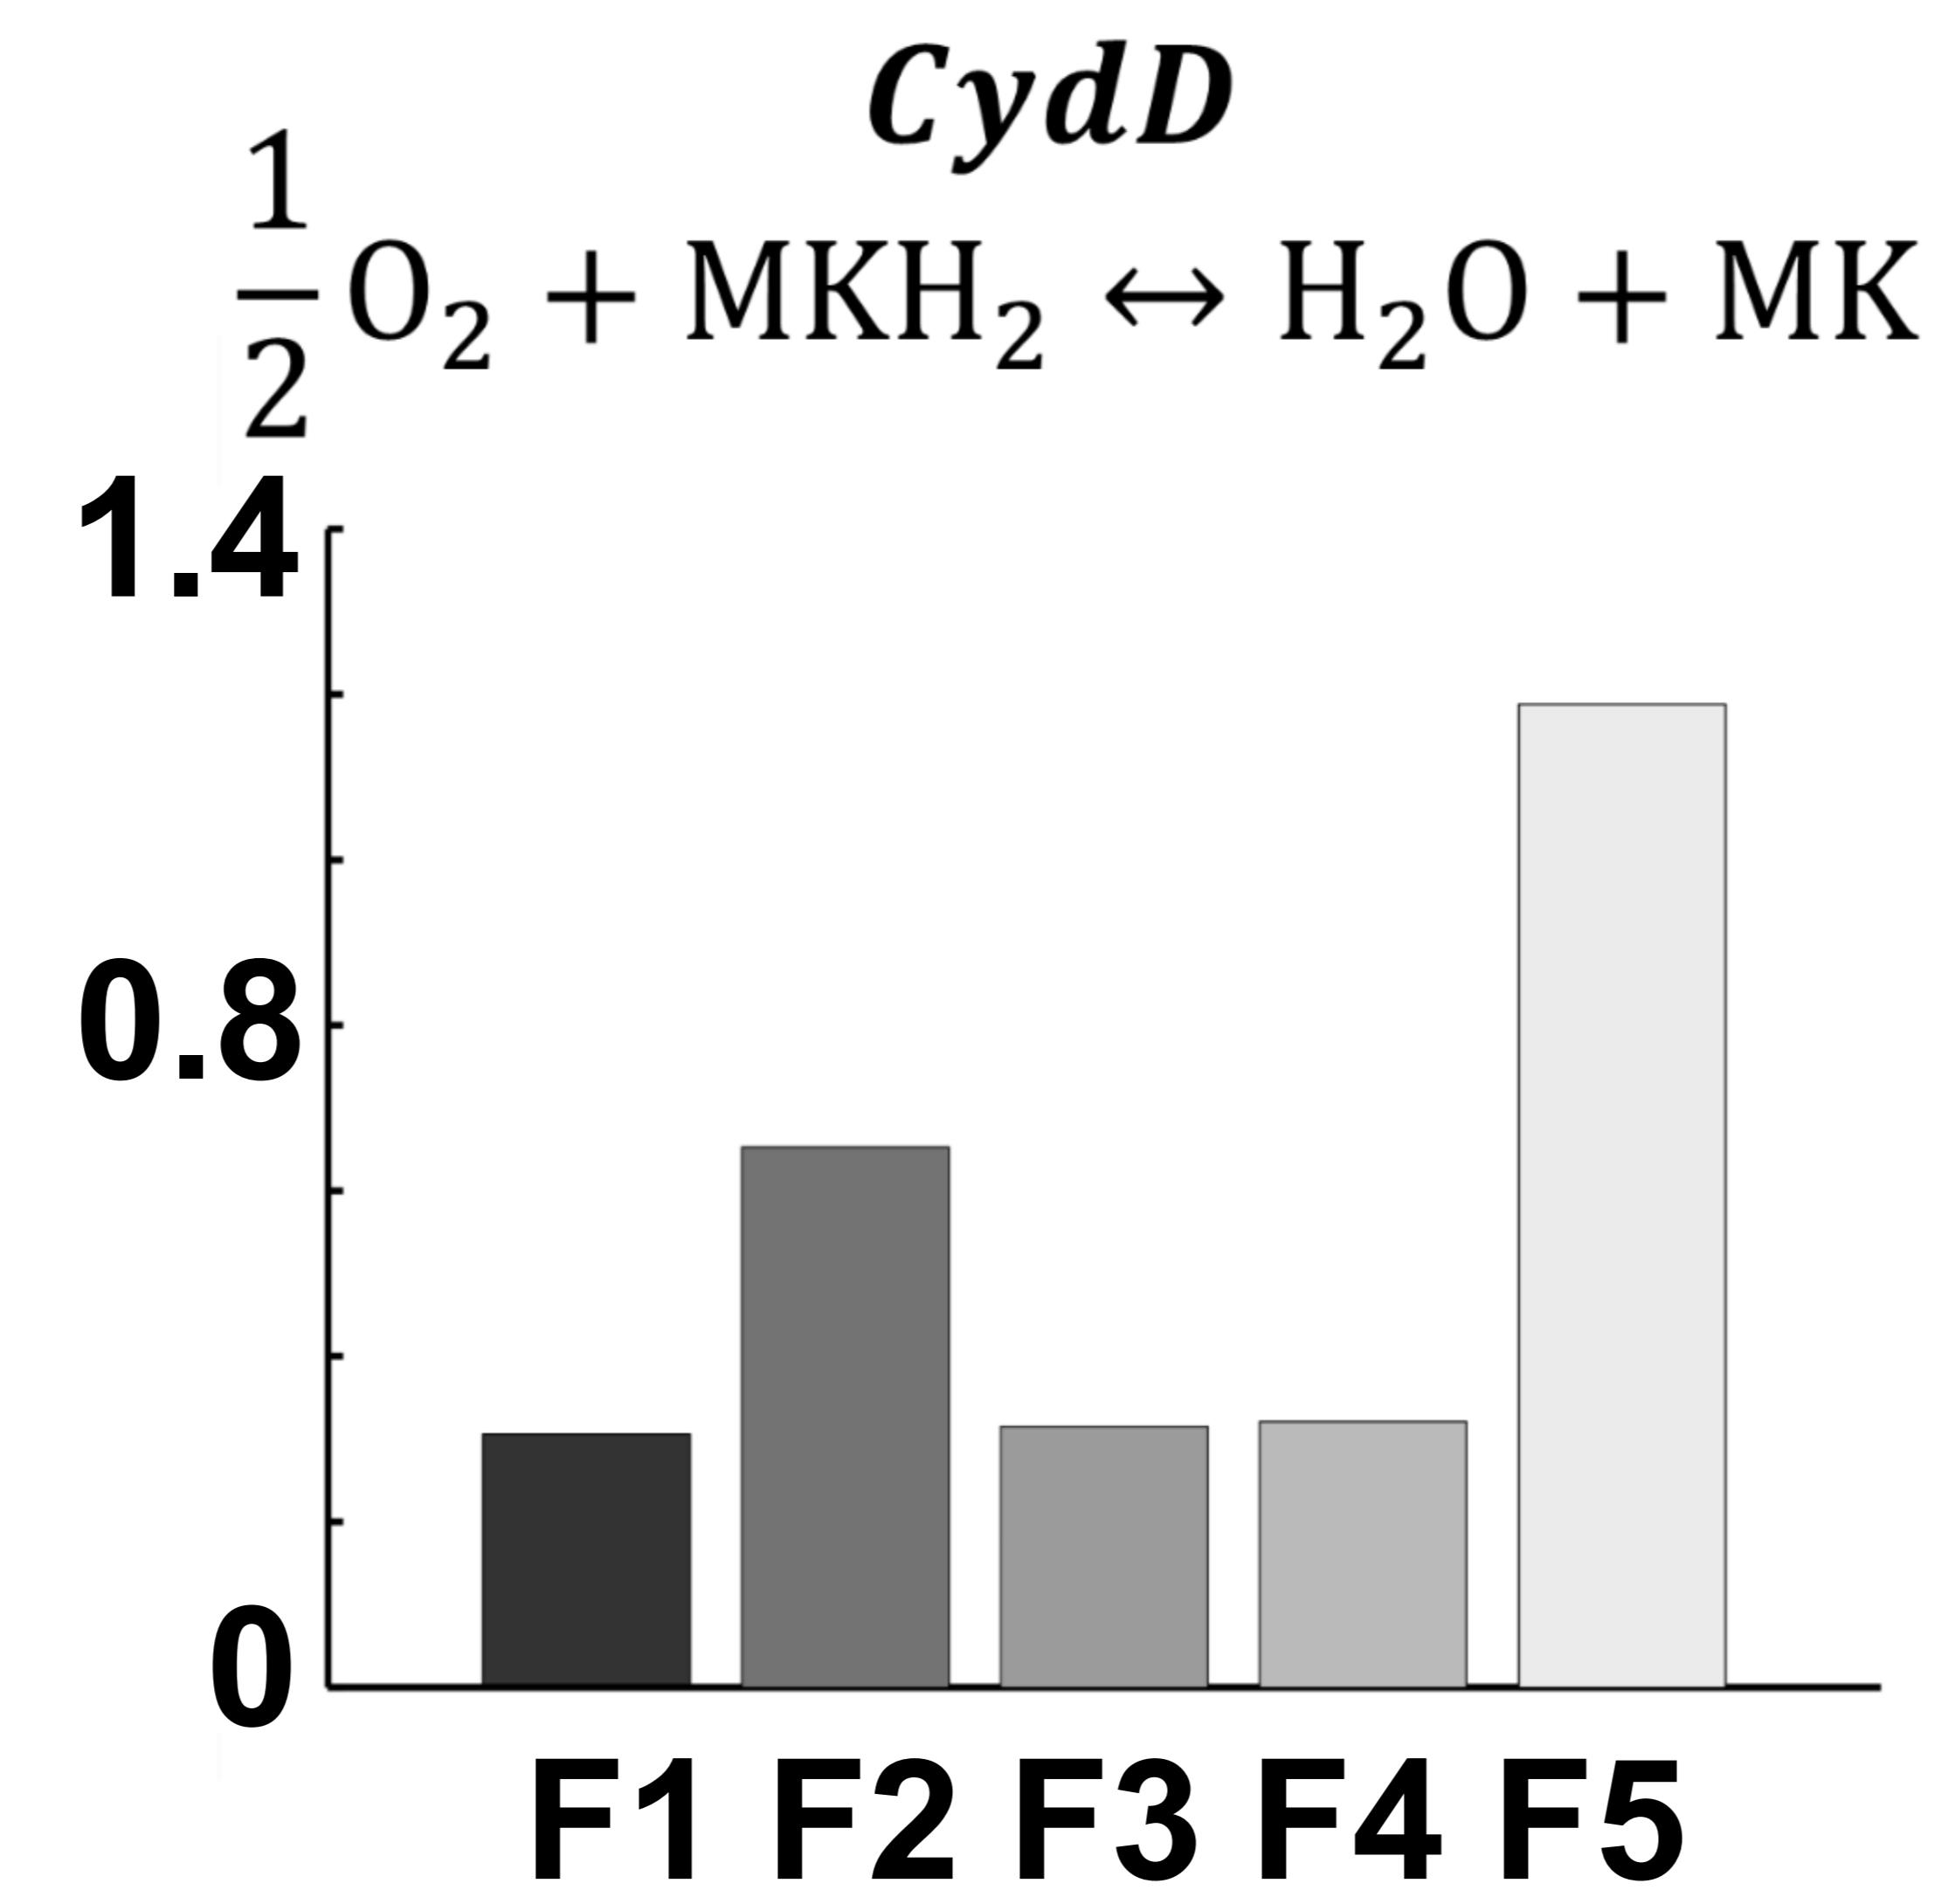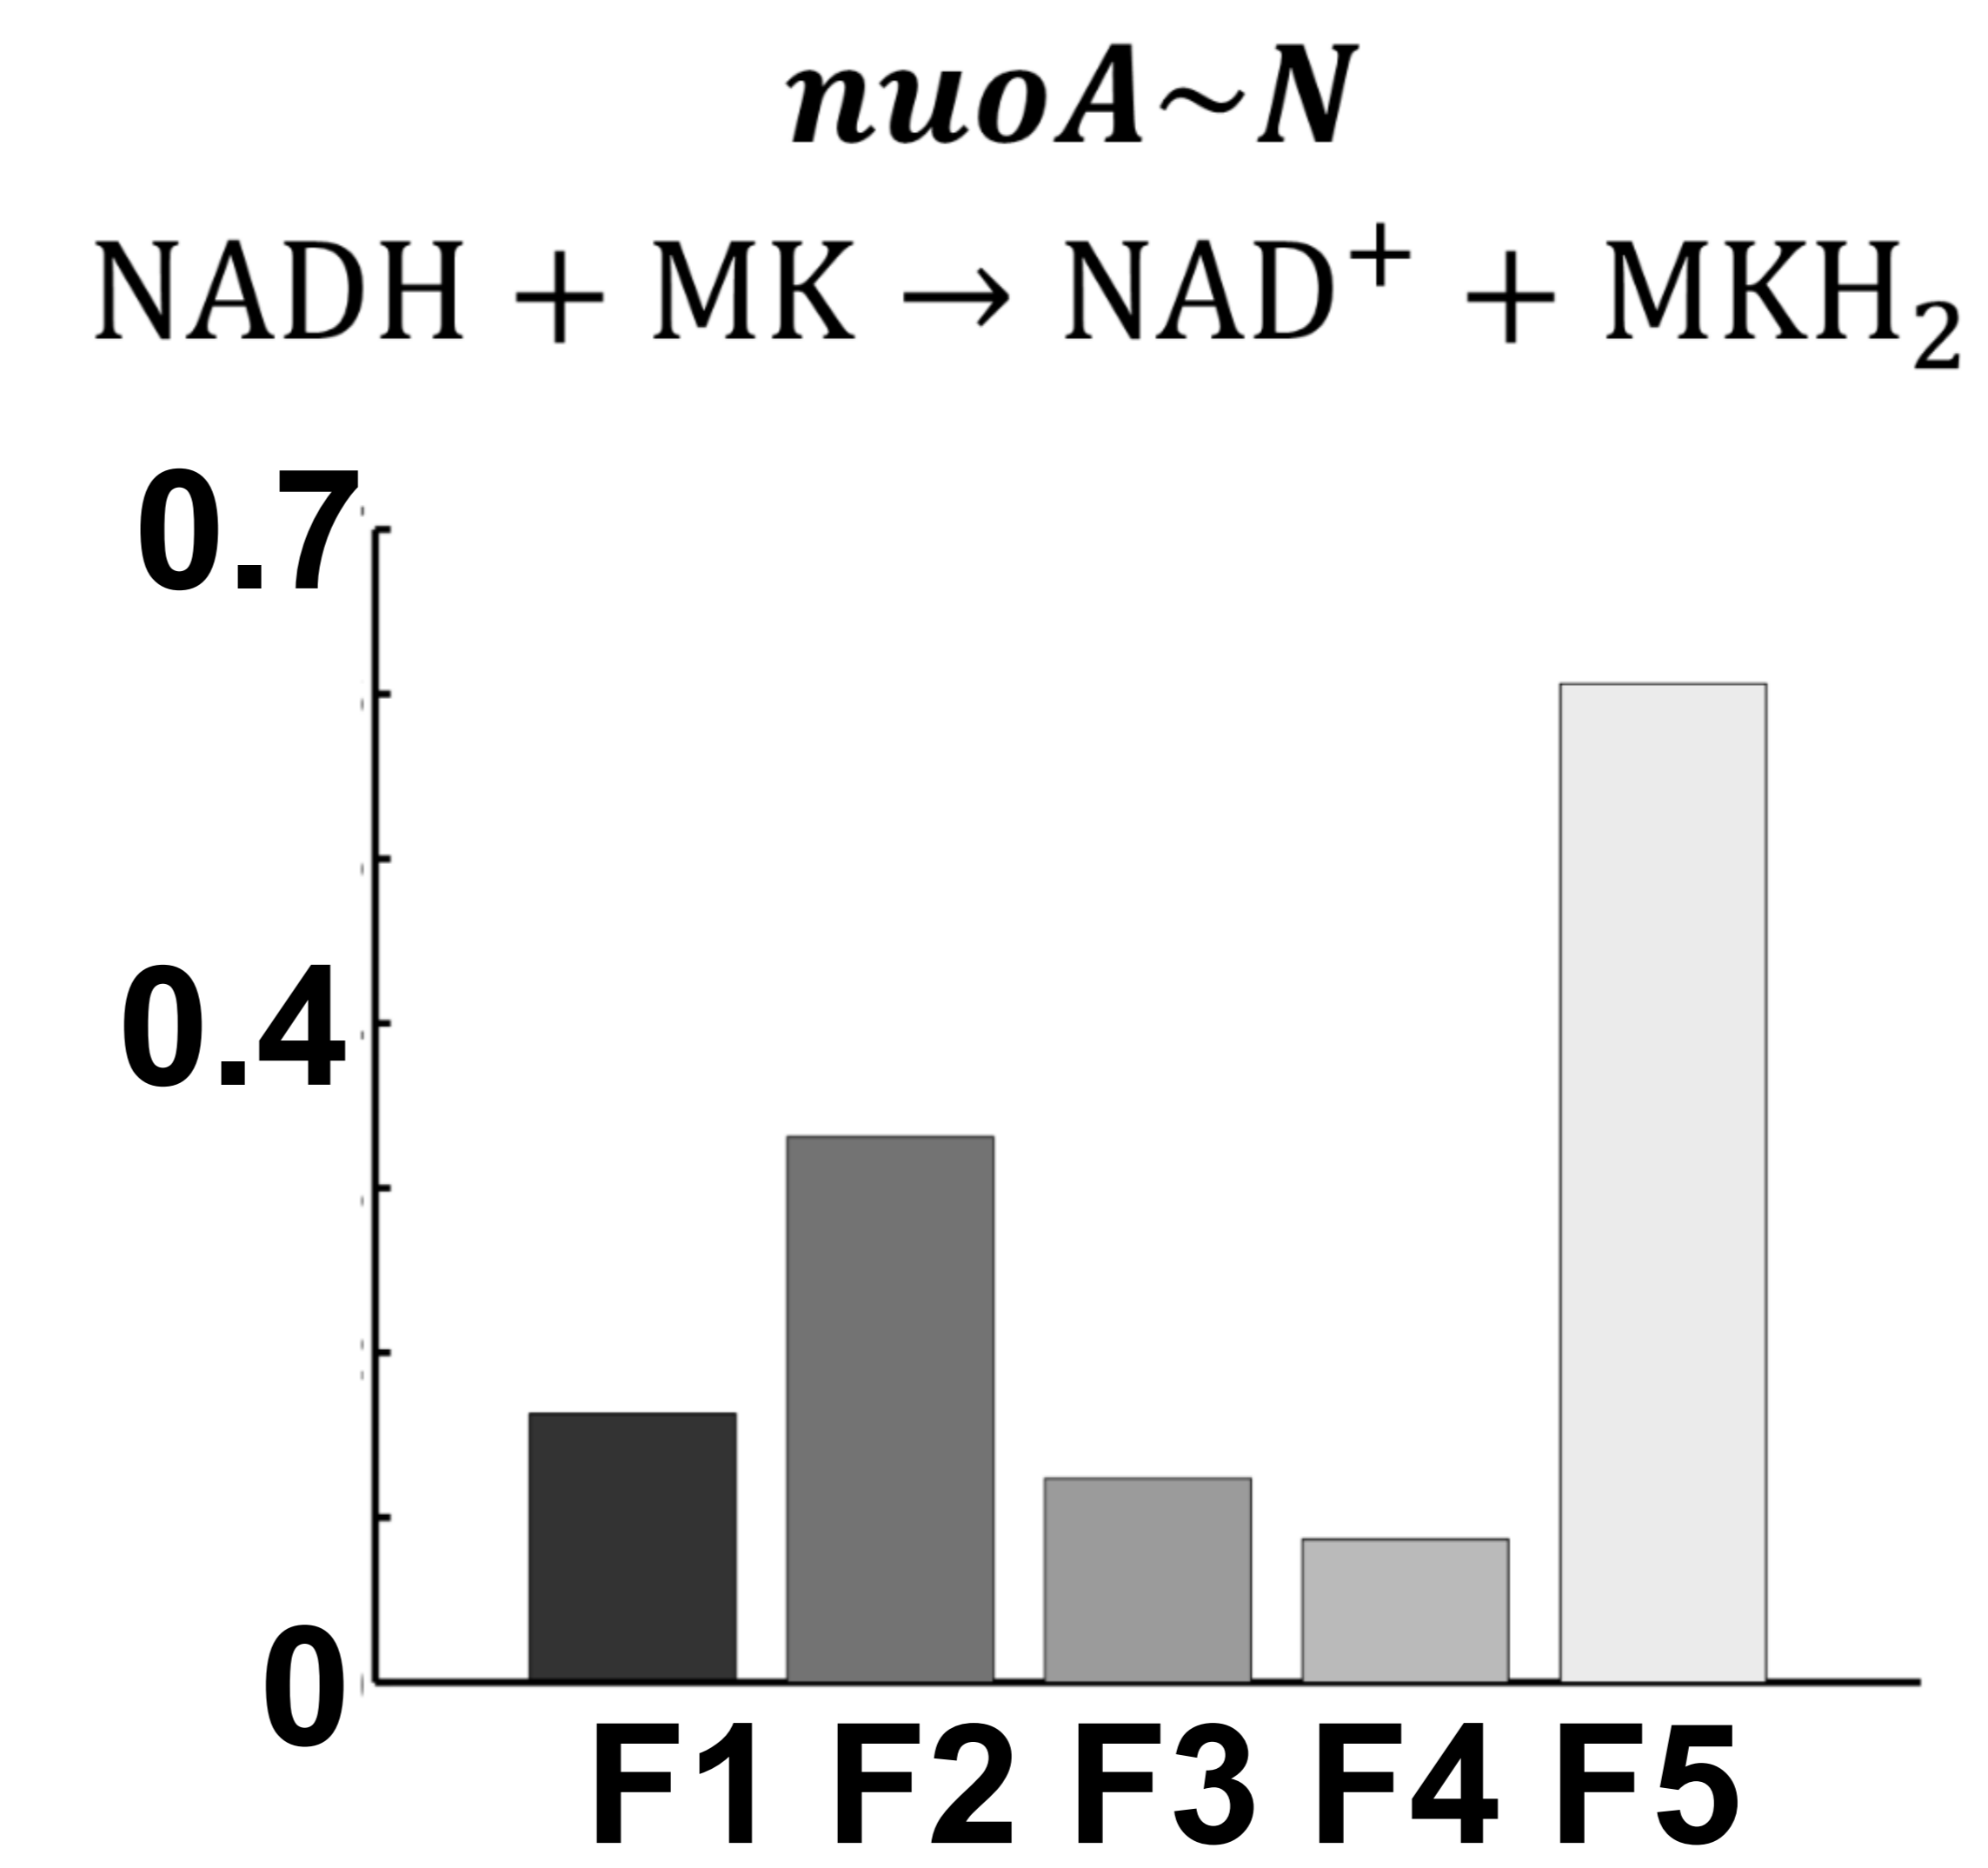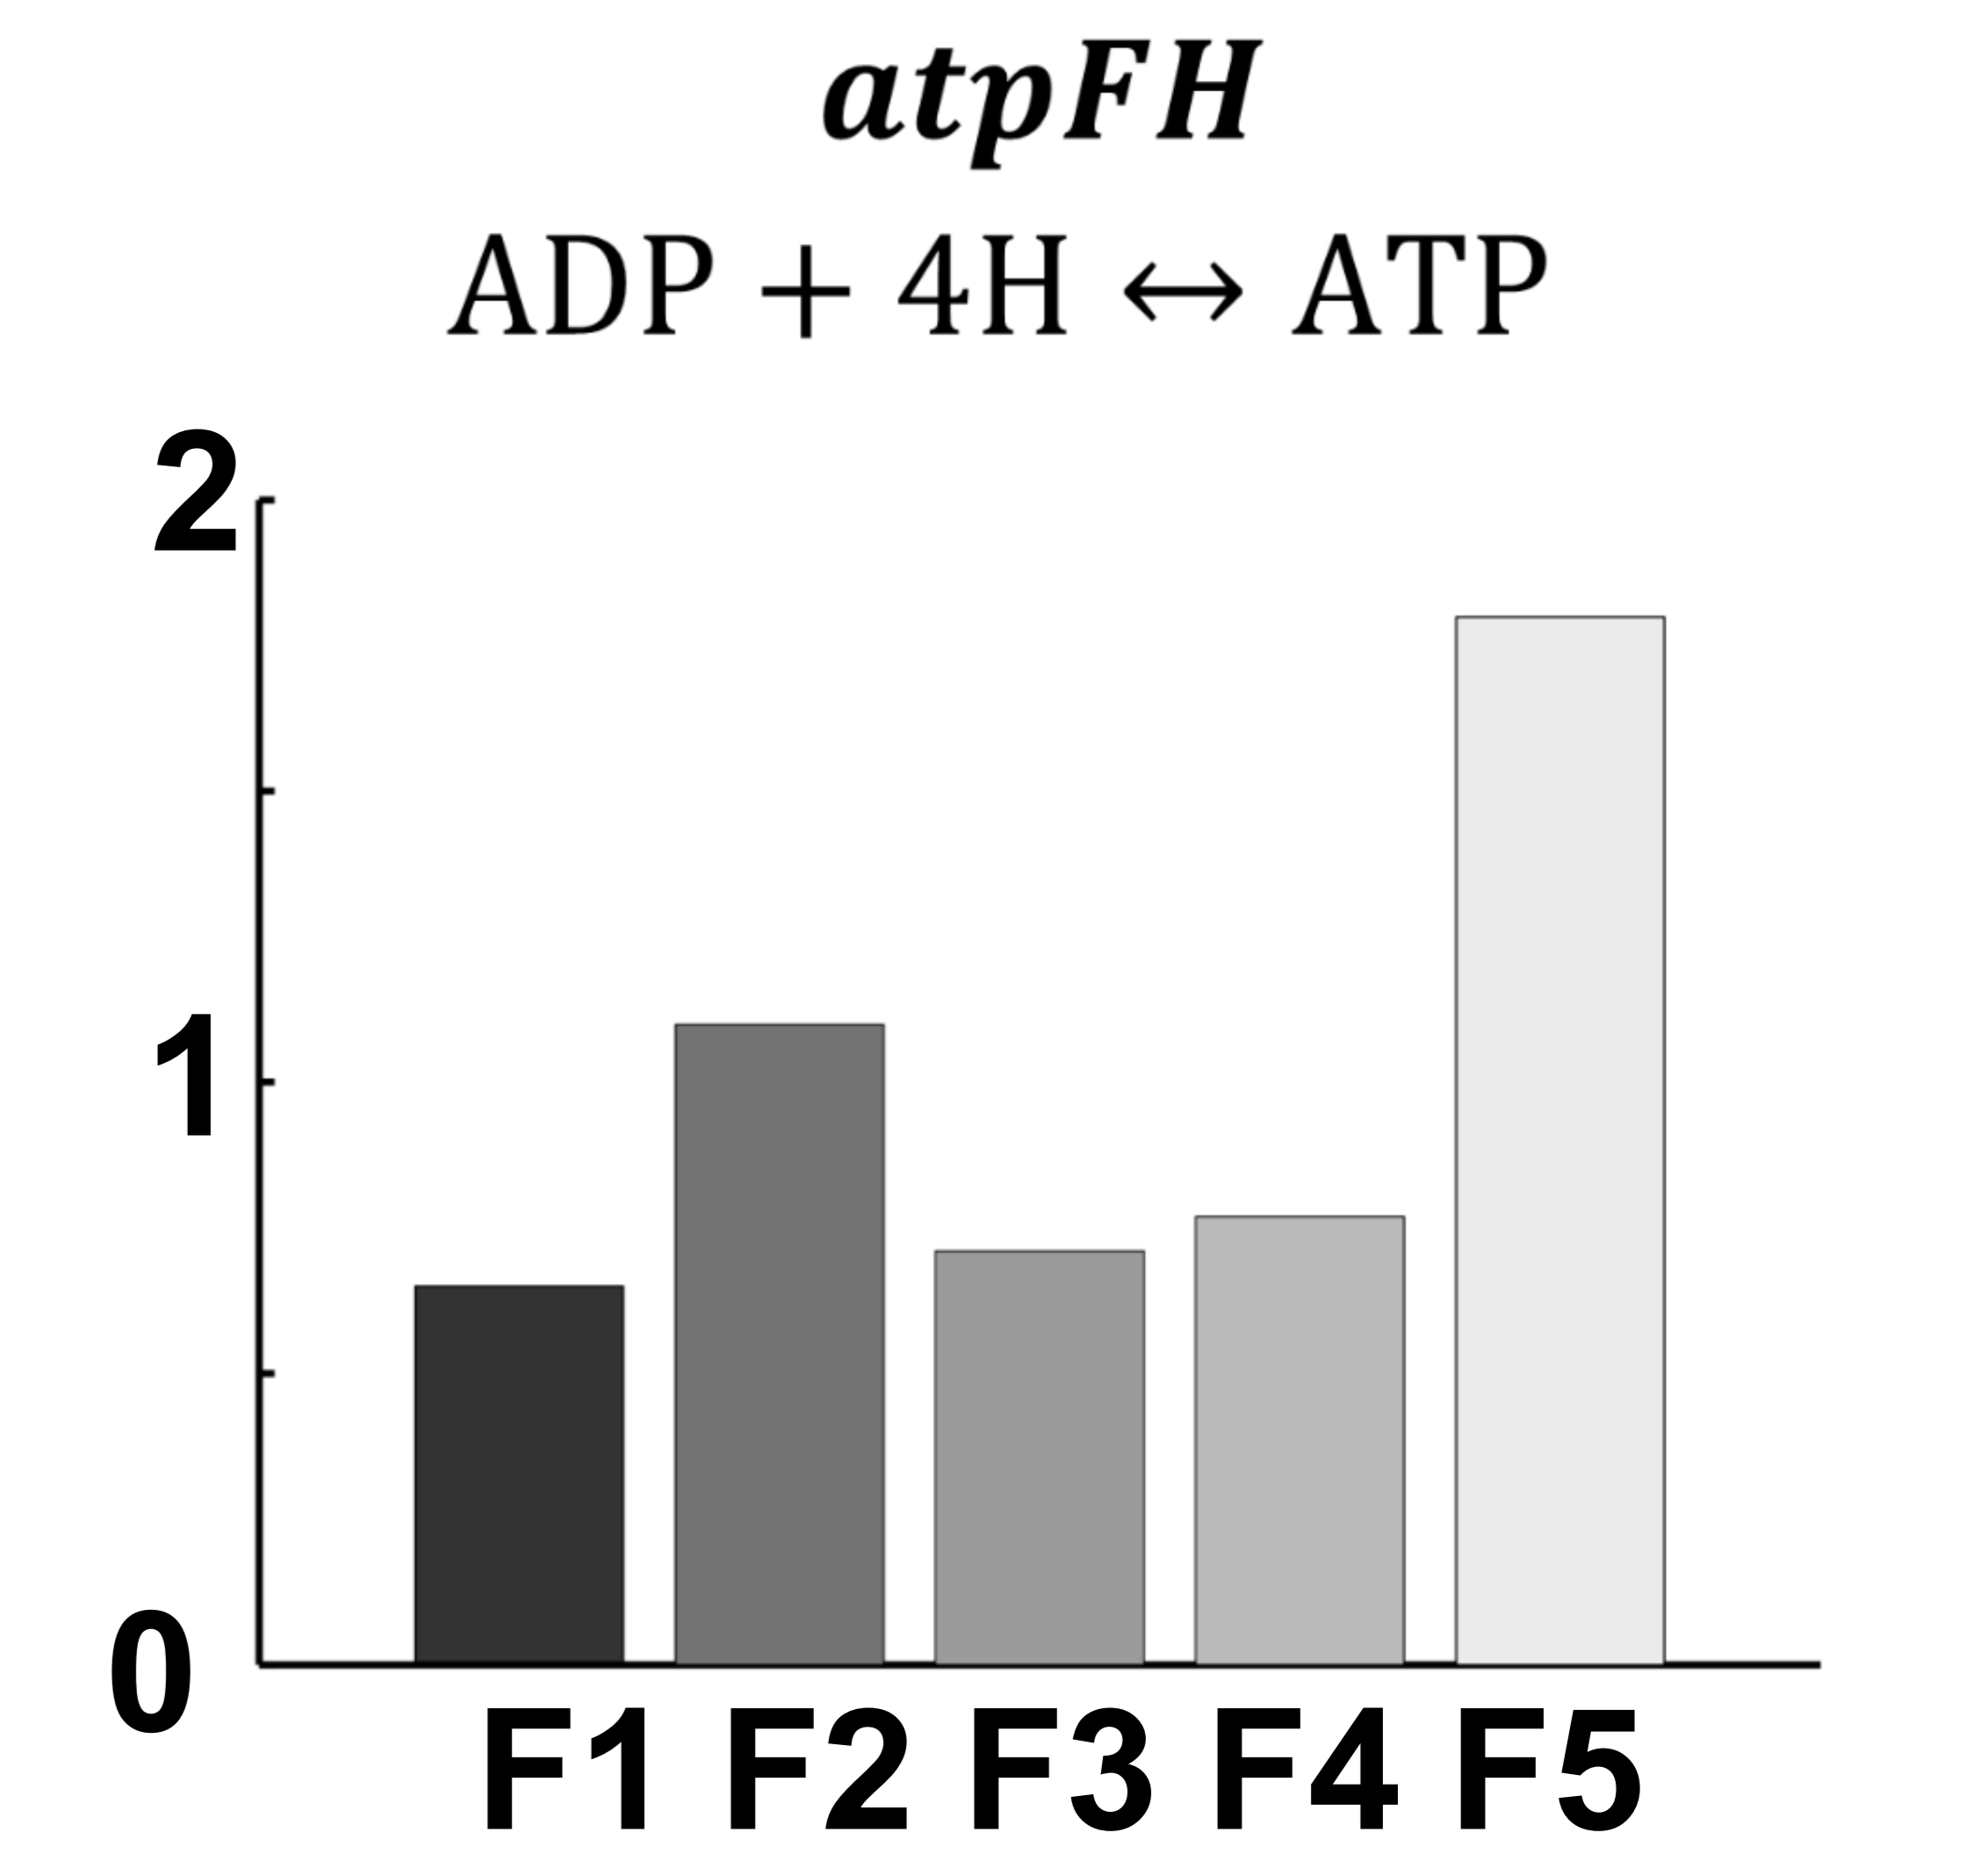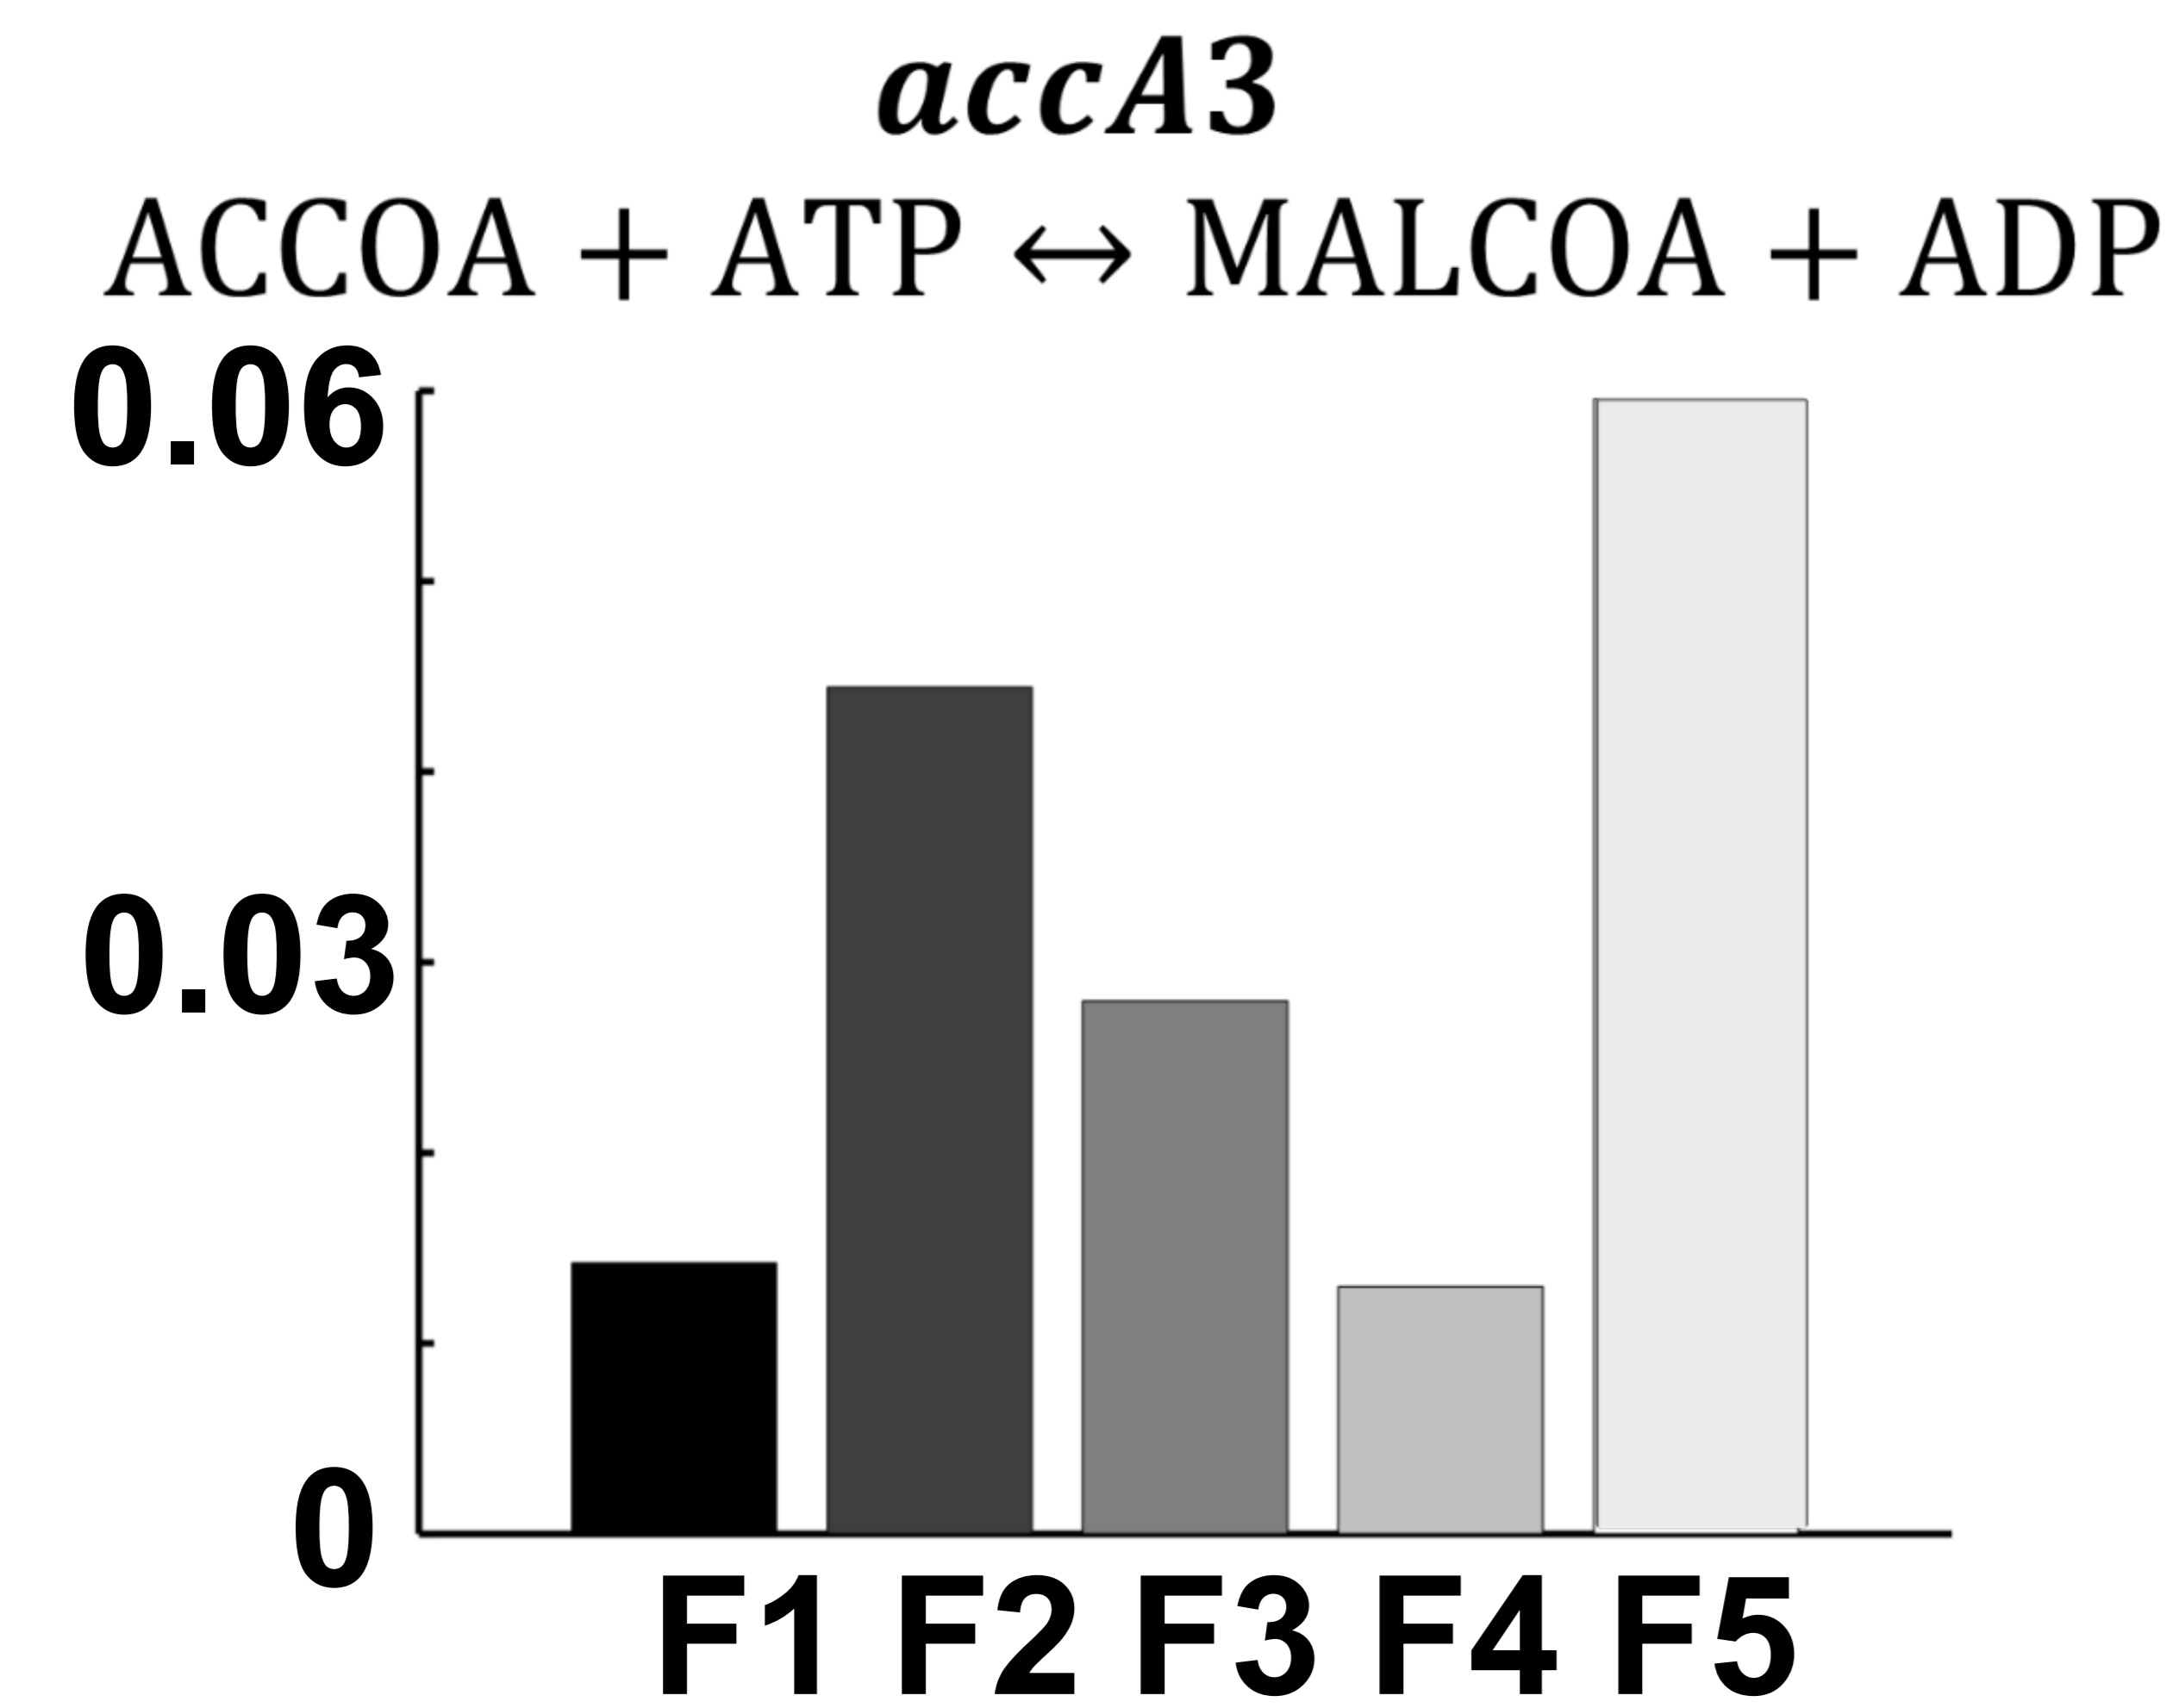

Supplement: 12918_2017_496_MOESM10_ESM.pdf [file 12918_2017_496_MOESM10_ESM.pdf]
